# Supplementary material for: Stakeholders barriers and facilitators for the implementation of a personalised digital care pathway: a qualitative study
Source: HighWire-hosted journal article supplement (doi:10.1136/bmjopen-2022-065778), 2022-11-01
Supplement: bmjopen-2022-065778supp001_data_supplement.pdf [file bmjopen-2022-065778supp001_data_supplement.pdf]

## APPENDIX 1. TOPIC LIST AND INTERVIEW GUIDE

### **Introductie:**

Hartelijk dank voor uw deelname aan dit interview. <introductie van mezelf en doel van onderzoek>  
Het interview zal ongeveer drie kwartier tot een uur duren.

Heeft u nog vragen voor we beginnen?

Mag ik dit interview opnemen? Dan kunnen we nu starten met het interview en de opname.

<recorder aanzetten>

<nogmaals bevestiging vragen op recording voor opnemen>

Om u een idee te geven hoe het interview eruit gaat zien zijn dit de onderwerpen die we gaan behandelen: informatievoorziening huidige situatie, de gewenste situatie en MediMapp en wat uw verwachtingen zijn van MediMapp

Ik zou graag willen beginnen met de vraag of u kunt vertellen wie u bent en wat u doet?

*(geslacht, welke afdeling, functie: hoe lang en eindverantwoordelijke, patiëntgroep)*

Omdat dit interview over een digitale tool gaat, namelijk MediMapp, ben ik benieuwd of u affiniteit heeft met het gebruik van eHealth? Kunt u dit scoren van 1-5?

- En hoe kijkt u aan tegen het digitaliseren van informatievoorziening voor patiënten?
- Bent u al eens in aanraking geweest met MediMapp?
  - o In hoeverre bent u betrokken geweest bij de ontwikkeling van MediMapp?

### **Informatievoorziening huidige situatie**

Kunt u kort beschrijven hoe de informatievoorziening er op dit moment uit ziet? Wij definiëren informatievoorziening als het faciliteren van informatie voor patiënten, met de beschikbare middelen, zowel mondeling als schriftelijk.

- Wat vindt u hier goed gaan? En wat kan nog verbeterd worden?
- Wat denkt u dat patiënten zouden willen veranderen?

### **Gewenste situatie**

- Als u nu de informatievoorziening *opnieuw* zou mogen *inrichten*, hoe ziet dit er dan voor u uit? *(vorm, proces, hoeveelheid, kwaliteit, begrijpelijkheid, toegankelijkheid, personalisatie)*
- Wat hoopt/denkt u dat goede informatievoorziening kan *opleveren*? *(vertrouwen, gesprek, arts-patiëntrelatie, overzicht, verwachtingen, voorbereiding)*
- Wat ziet u als de belangrijkste risico's in deze gewenste situatie?

### **Kan MediMapp de oplossing zijn?**

<korte uitleg MediMapp, digitaal patiëntpad waar nodig>

### **Verwachting MediMapp**

- Wat verwacht u dat MediMapp kan bijdragen aan uw dagelijkse werkzaamheden?
  - o Voor u om informatie makkelijker te voorzien? *(kennis, vaardigheden, motivatie, tijd, ondersteuning, patiënt kenmerken)*
  - o Voor patiënt? *(vertrouwen, gesprek, arts-patiëntrelatie, overzicht, verwachtingen, voorbereiding)*
  - o Wat zou voor u de meerwaarde zijn? *(En voor verpleegkundige / baliemedewerker / overig)*
- Verwacht u MediMapp te gaan gebruiken?
  - o *Hoe? Geloof in MediMapp?*
- Als u MediMapp wilt gaan gebruiken, wat heeft u dan nodig in de praktijk?  
**Voordeel t.o.v. huidige situatie / aanpasbaarheid, veranderbaar, verfijndheid etc. / complexiteit**
- Verwacht u dat er veel gaat veranderen aan uw dagelijkse werkzaamheden als u MediMapp gaat gebruiken?
  - o Hoe kijkt u aan tegen zo'n verandering?
- Hoe verwacht u dat uw collega's zullen reageren op het gebruik van MediMapp?

**kennis en geloof in innovatie / Mening over MediMapp / Kijk tegenover verandering / verhouding met organisatie / Andere persoonlijke kenmerken (motivatie, capaciteit, leiderschap stijl)**

- Denkt u dat MediMapp kan landen binnen uw afdeling?
  - o *Waarom? Hoe?*  
**Netwerk en communicatie / bereidwilligheid van afdeling t.o.v. implementatie (cultuur, normen, waarden en aannames) / implementatie klimaat van afdeling**
- Is MediMapp **passend** bij het Amsterdam UMC? (normen, waarden, werksystemen en stromen)  
**Bereidwilligheid van Amsterdam UMC t.o.v. implementatie / verbintenis van medewerkers / informatie en kennis beschikbaar**

### **Implementatie:**

- Hoe denkt u dat MediMapp het best geïmplementeerd kan worden? En waarom?
  - o Wat heeft uw afdeling hiervoor nodig?  
**Netwerk en communicatie / cultuur, normen, waarden en aannames / implementatie klimaat / kijk tegen verandering / actieve implementatie**
  - o Waar gaan we tegenaan lopen tijdens de implementatie?
  - o Wat gaat ons helpen tijdens de implementatie?
  - o Waar ging het mis bij de implementatie van vorige projecten / oplossingen?  
*Klinische formulieren in Epic*
  - o Tijdens een implementatieproces is het belangrijk dat er actieve betrokkenheid is van de organisatie. Hoe ervaart u dat dit wordt gedaan bij het Amsterdam UMC?  
**Planning / (actief) meedoen / (actief) meegenomen worden (door manager, leider, collega) / uitvoering / terugkijken en evalueren**
- Zijn er nog factoren in het Amsterdam UMC die de implementatie van MediMapp moeilijker maken of moeilijker maken?  
*(beleid, draagvlak, expertise, samenwerking andere afdelingen, financiën, EPD, etc).*
- Zijn er nog andere factoren in de *brede context* die invloed hebben op de implementatie van MediMapp?  
*(everancier, zorgverzekeraar, betaalbaarheid voor organisatie etc.)*
- **DUS** Wat zijn bevorderende factoren voor de implementatie van MediMapp? En wat zijn belemmerende factoren?  
*Op de afdeling, gehele organisatie en bredere context*

### **Afsluiting**

Dit was mijn laatste vraag. Zijn er nog dingen die we niet besproken hebben, maar waarvan u denkt dat deze wel relevant zijn voor dit project?

Vervolg uitleggen: verdere interviews doen en het verwerken van deze interviews, bevorderende en belemmerende factoren in kaart brengen. Hierop ga ik dan een advies uitbrengen voor implementatie strategieën die we kunnen toepassen.

Mochten we nog meer deelnemers nodig hebben, mag ik u dan benaderen voor contactlegging met andere collega's?
